# Supplementary material
Source: HighWire-hosted journal article supplement (https://drc.bmj.com/content/7/1/e000591)
Supplement: inline-supplementary-material-1 [file inline-supplementary-material-1.docx]

| Patient | Family history of autoimmunity | Personal history of autoimmunity | Personal history and therapy of type 2 diabetes |
| --- | --- | --- | --- |
| 1 | Celiac disease | - | - |
| 2 | - | - | - |
| 3 | Hashimoto’s thyroiditis | Hashimoto’s thyroiditis | - |
| 4 | - | - | - |
| 5 | - | Hashimoto’s thyroiditis | - |
| 6 | - | - | - |
| 7 | - | - | - |
| 8 | Type 1 diabetes | - | - |
| 9 | - | - | - |
| 10 | Ulcerative colitis | - | - |
| 11 | - | - | - |
| 12 | NA | - | - |
| 13 | NA | Hashimoto’s thyroiditis | Type 2 diabetes;  no medications |
| 14 | NA | - | Type 2 diabetes;  SFU, basal insulin |
| 15 | - | - | Type 2 diabetes;  SFU |
| 16 | - | - | Type 2 diabetes; metformin, SFU |
| 17 | - | - | Type 2 diabetes;  no medications |
| 18 | NA | - | Type 2 diabetes; metformin, MDI |
| 19 | NA | - | Type 2 diabetes;  metformin |
| 20 | Psoriasis | - | Type 2 diabetes;  no medications |
| 21 | NA | - | Type 2 diabetes;  basal insulin |

Supplemental Table S1: Family history of autoimmunity and personal history of autoimmunity and pre-existing type 2 diabetes in cases of ICI induced diabetes
